# Supplementary material for: The Nef Protein of the Macrophage Tropic HIV-1 Strain AD8 Counteracts Human BST-2/Tetherin
Source: MDPI journal article supplement (doi:10.3390/v12040459), 2020-04-18
Supplement: s1 [file s1]

| Name                                 | Vector      | Origin                            | Description                                                                                                                                                                                                                                                                                                                                                                                                                                                                               |
|--------------------------------------|-------------|-----------------------------------|-------------------------------------------------------------------------------------------------------------------------------------------------------------------------------------------------------------------------------------------------------------------------------------------------------------------------------------------------------------------------------------------------------------------------------------------------------------------------------------------|
| AD8(+)                               | pBR322      | K. Strebel (NIAID, Bethesda, USA) | See reference (1).                                                                                                                                                                                                                                                                                                                                                                                                                                                                        |
| AD8(-)                               | pBR322      | K. Strebel (NIAID, Bethesda, USA) | See reference (1).                                                                                                                                                                                                                                                                                                                                                                                                                                                                        |
| AD8(U <sub>del2</sub> )              | pBR322      | K. Strebel (NIAID, Bethesda, USA) | See reference (2).                                                                                                                                                                                                                                                                                                                                                                                                                                                                        |
| AD8(+) $\Delta$ Nef                  | pBR322      | this study                        | Nef-deficient AD8(+). Nef frame shift mutation introduced using the primers 5'-GGCCT ACTGT AAGGG AAAGA ATAGA CACGA GCTGA GC-3' and 5'-GCTCA GCTCG TGTCT ATTCT TTCCC TTACA GTAGG CC-3', and the QuikChange II XL Site-Directed Mutagenesis Kit (Agilent Technologies, Wokingham, UK) according to the manufacturer's instructions.                                                                                                                                                         |
| AD8(-) $\Delta$ Nef                  | pBR322      | this study                        | Nef-deficient AD8(-). Nef frame shift mutation introduced as described for AD8(+) $\Delta$ Nef.                                                                                                                                                                                                                                                                                                                                                                                           |
| AD8(U <sub>del2</sub> ) $\Delta$ Nef | pBR322      | this study                        | Nef-deficient AD8(U <sub>del2</sub> ). Nef frame shift mutation introduced as described for AD8(+) $\Delta$ Nef.                                                                                                                                                                                                                                                                                                                                                                          |
| VSVG                                 | pMDG        | G. Towers (UCL, London, UK)       | -                                                                                                                                                                                                                                                                                                                                                                                                                                                                                         |
| AD8 Nef wild type                    | pcDNA3.1(+) | this study                        | The Nef open reading frame (ORF) was amplified from AD8(+) and inserted into pcDNA3.1 using BamH1 and EcoR1 restriction sites.                                                                                                                                                                                                                                                                                                                                                            |
| AD8 Vpu                              | pcDNA3.1(+) | this study                        | The Vpu open reading frame (ORF) was amplified from AD8(+) and inserted into pcDNA3.1 using BamH1 and EcoR1 restriction sites.                                                                                                                                                                                                                                                                                                                                                            |
| AD8 Env                              | pcDNA3.1(+) | this study                        | The Env open reading frame (ORF) was amplified from AD8(-) and inserted into pcDNA3.1 using BamH1 and EcoR1 restriction sites.                                                                                                                                                                                                                                                                                                                                                            |
| HIV-1 Rev                            | pBC12/CMV   | G. Towers (UCL, London, UK)       | -                                                                                                                                                                                                                                                                                                                                                                                                                                                                                         |
| AD8 Nef E160A_LL164/165AA            | pcDNA3.1(+) | this study                        | The mutations LL164/165AA and E160A were consecutively introduced into AD8 Nef wild type using the primers 5'-CAATA AAGGA GAGAA CAACT GCGCG GCACA CCCTA TGAGC CAGCA TGGA-3' and 5'-TCCAT GCTGG CTCAT AGGGT GTGCC GCGCA GTTGT TCTCT CCTTT ATTG-3', and 5'-AGGCC AATAA AGGAG CGAAC AACTG CGCGG C-3' and 5'-GCCGC GCAGT TGTTC GCTCC TTTAT TGGCC T-3', respectively, and the QuikChange II Site-Directed Mutagenesis Kit (Agilent Technologies) according to the manufacturer's instructions. |
| AD8 Nef DD174/175RA                  | pcDNA3.1(+) | this study                        | The mutation was introduced into AD8 Nef wild type using the primers 5'-CAACA CTTCT CTCTC CGTGG CACGC ATTCC ATGCT GGCTC ATA-3' and 5'-TATGA GCCAG CATGG AATGC GTGCC ACGGA GAGAG AAGTG TTG-3', and the QuikChange II Site-Directed Mutagenesis Kit (Agilent Technologies) according to the manufacturer's instructions.                                                                                                                                                                    |

|                                              |             |                                                                                                     |                                                                                                                                                                                                                                                                                                |
|----------------------------------------------|-------------|-----------------------------------------------------------------------------------------------------|------------------------------------------------------------------------------------------------------------------------------------------------------------------------------------------------------------------------------------------------------------------------------------------------|
| AD8 Nef<br>E160A_LL164/165AA_<br>DD174/175RA | pcDNA3.1(+) | this study                                                                                          | The mutation DD174/175RA was introduced into AD8 Nef E160A_LL164/165A using the primers listed above and the QuikChange II Site-Directed Mutagenesis Kit (Agilent Technologies) according to the manufacturer's instructions.                                                                  |
| AD8 Nef G2A                                  | pcDNA3.1(+) | this study                                                                                          | The mutation was introduced into AD8 Nef wild type using the primers 5'-CTCGG ATCCA AGATG GCTGG CAAGT GGTCA AAA-3' and 5'-TTTTG ACCAC TTGCC AGCCA TCTTG GATCC GAG-3', and the QuikChange II Site-Directed Mutagenesis Kit (Agilent Technologies) according to the manufacturer's instructions. |
| NL4.3 Nef                                    | pcDNA3.1(+) | this study                                                                                          | The Nef open reading frame (ORF) was amplified from pNL4.3 (provided by C. Jolly, UCL, London, UK) and inserted into pcDNA3.1 using BamH1 and EcoR1 restriction sites.                                                                                                                         |
| AD8-NL4.3 Nef                                | pcDNA3.1(+) | this study                                                                                          | The N-terminal AD8 Nef domain was excised from AD8 Nef wild type using BamH1 and Bgl2 and ligated into NL4.3 Nef digested with the same restriction enzymes.                                                                                                                                   |
| NL4.3-AD8 Nef                                | pcDNA3.1(+) | this study                                                                                          | The N-terminal NL4.3 Nef domain was excised from NL4.3 Nef using BamH1 and Bgl2, and ligated into AD8 Nef wild type digested with the same restriction enzymes.                                                                                                                                |
| AD8 Nef IRES GFP                             | pCG         | this study                                                                                          | The ORF was inserted into pCG using Xba1 and Mlu1 restriction sites.                                                                                                                                                                                                                           |
| NL4.3 Nef IRES GFP                           | pCG         | modified in this study<br>(originally obtained from<br>F. Kirchhoff, University of<br>Ulm, Germany) | The ORF was inserted into pCG using Xba1 and Mlu1 restriction sites.                                                                                                                                                                                                                           |
| JR-CSF Nef IRES GFP                          | pCG         | F. Kirchhoff (University of<br>Ulm, Germany)                                                        | -                                                                                                                                                                                                                                                                                              |
| SF2 Nef IRES GFP                             | pCG         | F. Kirchhoff (University of<br>Ulm, Germany)                                                        | -                                                                                                                                                                                                                                                                                              |
| CH077 Nef IRES GFP                           | pCG         | F. Kirchhoff (University of<br>Ulm, Germany)                                                        | -                                                                                                                                                                                                                                                                                              |
| CH198 Nef IRES GFP                           | pCG         | F. Kirchhoff (University of<br>Ulm, Germany)                                                        | -                                                                                                                                                                                                                                                                                              |
| 2693BA Nef IRES GFP                          | pCG         | F. Kirchhoff (University of<br>Ulm, Germany)                                                        | -                                                                                                                                                                                                                                                                                              |
| OMRCA Nef IRES GFP                           | pCG         | modified in this study<br>(originally obtained from<br>F. Kirchhoff, University of<br>Ulm, Germany) | The ORF was inserted into pCG using Xba1 and Mlu1 restriction sites.                                                                                                                                                                                                                           |
| 13127K2 Nef IRES GFP                         | pCG         | F. Kirchhoff (University of<br>Ulm, Germany)                                                        | -                                                                                                                                                                                                                                                                                              |
| RBF168 Nef IRES GFP                          | pCG         | F. Kirchhoff (University of<br>Ulm, Germany)                                                        | -                                                                                                                                                                                                                                                                                              |
| 7312 Nef IRES GFP                            | pCG         | modified in this study<br>(originally obtained from                                                 | The ORF was inserted into pCG using Xba1 and Mlu1 restriction sites.                                                                                                                                                                                                                           |

|                            |     |                                              |   |
|----------------------------|-----|----------------------------------------------|---|
|                            |     | F. Kirchhoff, University of<br>Ulm, Germany) |   |
| NL4.3 Nef_stop IRES<br>GFP | pCG | F. Kirchhoff (University of<br>Ulm, Germany) | - |

1. **Theodore TS, Englund G, Buckler-White A, Buckler CE, Martin MA, Peden KW.** 1996. Construction and characterization of a stable full-length macrophage-tropic HIV type 1 molecular clone that directs the production of high titers of progeny virions. *AIDS Res Hum Retroviruses* **12**:191–194.
2. **Schubert U, Clouse KA, Strebel K.** 1995. Augmentation of virus secretion by the human immunodeficiency virus type 1 Vpu protein is cell type independent and occurs in cultured human primary macrophages and lymphocytes. *J Virol* **69**:7699–7711.
